# Supplementary material for: The Antarctic stratospheric nitrogen hole: Southern Hemisphere and Antarctic springtime total nitrogen dioxide and total ozone variability as observed by Sentinel-5p TROPOMI
Source: Copernicus journal article supplement (doi:10.5194/acp-24-4511-2024), 2024-04-17
Supplement: Supplementary file 1 [file acp-24-4511-2024-supplement.zip]

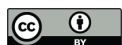

*Supplement of*

**The Antarctic stratospheric nitrogen hole: Southern Hemisphere and Antarctic springtime total nitrogen dioxide and total ozone variability as observed by Sentinel-5p TROPOMI**

**Adrianus de Laat et al.**

*Correspondence to:* Adrianus de Laat (laatdej@knmi.nl)

- [acp-24-4511-2024-supplement-title-page.pdf](#)
- [s5p\\_no2\\_o3\\_2D\\_histogram\\_80x40\\_2018\\_allpixels.mp4](#)

The copyright of individual parts of the supplement might differ from the article licence.
